# Supplementary material for: Activation of intact bacteria and bacterial fragments mixed with agar as cloud droplets and ice crystals in cloud chamber experiments
Source: Copernicus journal article supplement (doi:10.5194/acp-18-17497-2018), 2018-12-11
Supplement: Supplementary file 1 [file acp-18-17497-2018-supplement.pdf]

Supplement of Atmos. Chem. Phys., 18, 17497–17513, 2018  
<https://doi.org/10.5194/acp-18-17497-2018-supplement>  
© Author(s) 2018. This work is distributed under  
the Creative Commons Attribution 4.0 License.

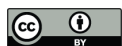

*Supplement of*

## **Activation of intact bacteria and bacterial fragments mixed with agar as cloud droplets and ice crystals in cloud chamber experiments**

**Kaitlyn J. Suski et al.**

*Correspondence to:* Alla Zelenyuk ([alla.zelenyuk-imre@pnnl.gov](mailto:alla.zelenyuk-imre@pnnl.gov))

The copyright of individual parts of the supplement might differ from the CC BY 4.0 License.

**Table S1. Experimental parameters for the three expansions including the bacteria used, the temperature range during each expansion, the maximum RH<sub>w</sub> and RH<sub>i</sub> achieved, the range of calculated PCVI or IS-PCVI cut-sizes, the PCVI and IS-PCVI enhancement factors and transmission efficiencies, CCN/CN, and INP/CN.**

| Expansion #                              | 1                    | 2           | 3           |
|------------------------------------------|----------------------|-------------|-------------|
| FIN01 Experiment #                       | 36                   | 37          | 38          |
| Bacteria                                 | pseudomonas syringae | PF CGina    | PF CGina    |
| Temperature Range (°C)                   | -4 to -12            | -4 to -11   | -4 to -12   |
| Maximum RH <sub>w</sub> (%)              | 97                   | 96          | 96          |
| Maximum RH <sub>i</sub>                  | 109                  | 107         | 107         |
| PCVI Cut-size Range(μm)                  | 5.6 to 15.9          | 4.5 to 12.6 |             |
| IS-PCVI Cut-size Range (μm)              |                      |             | 7.0 to 24.8 |
| PCVI/IS-PCVI Enhancement Factor          | 2                    | 2           | 12          |
| PCVI/IS-PCVI Transmission Efficiency (%) | 94.4                 | 61.9        | 91.5        |
| CCN/CN                                   | 0.45                 | 0.30        | 0.47        |
| INP/CN                                   | 0.0014               | 0.0016      | 0.0004      |

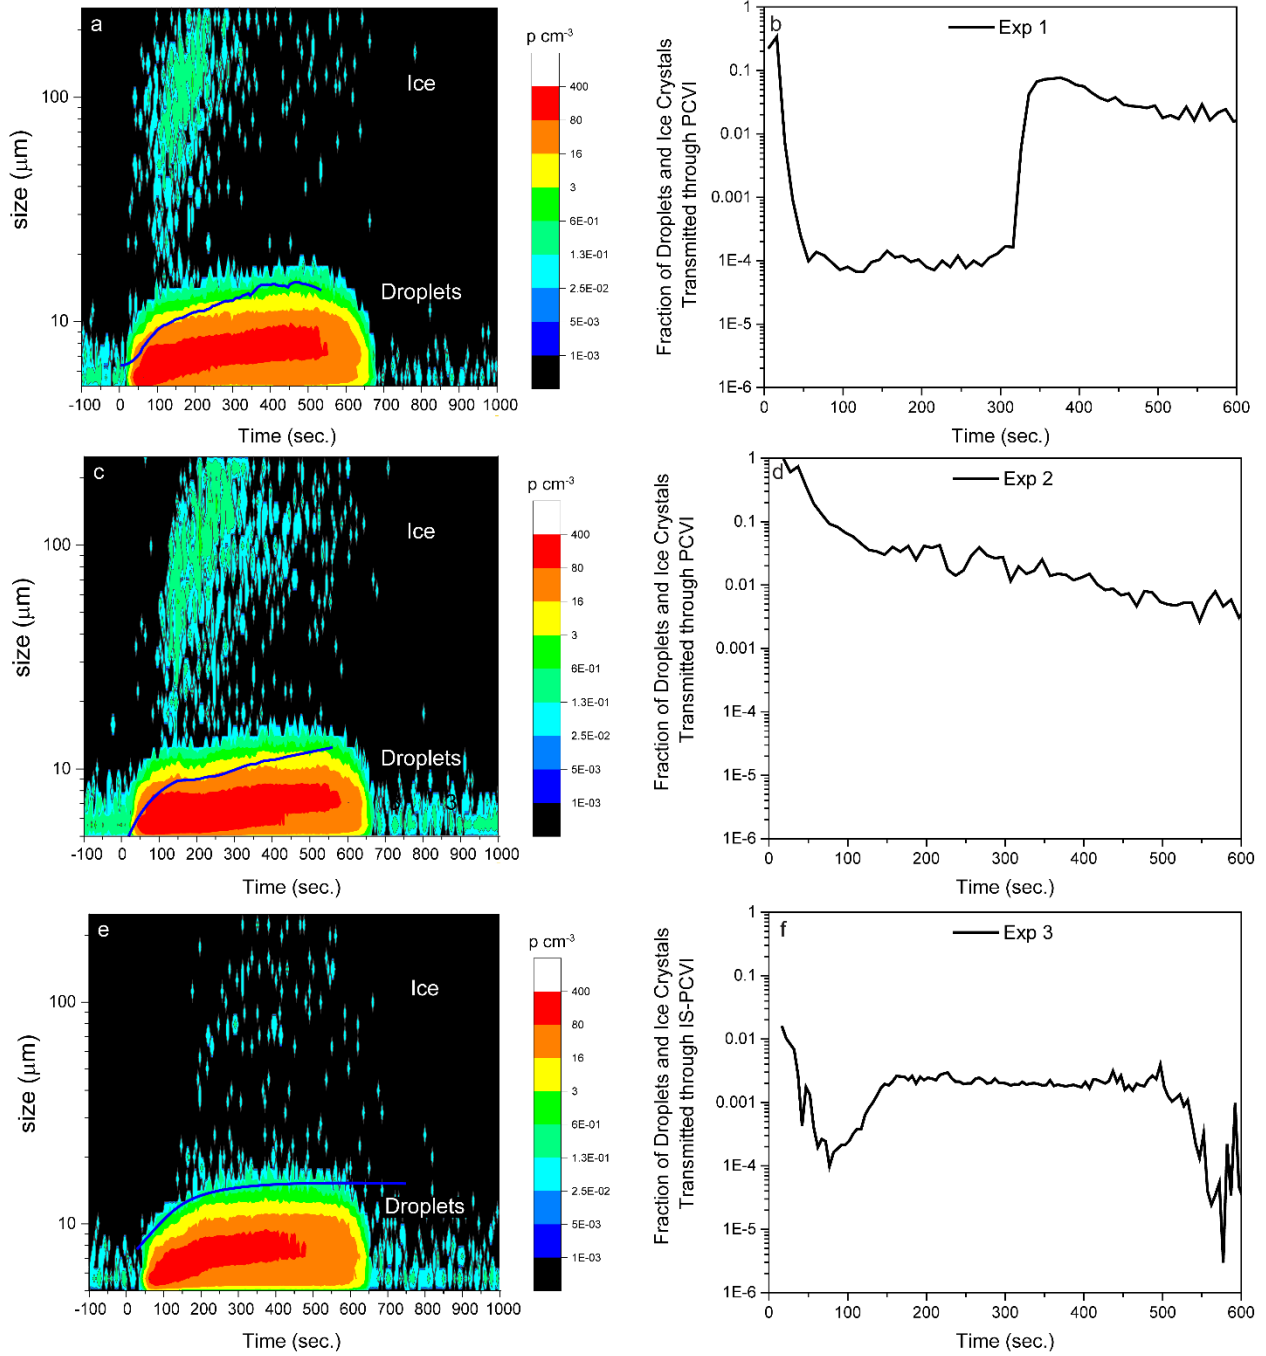

**Figure S1:** The welas2-measured size distributions, calculated cut-sizes, and fractions of cloud droplet and ice crystals that are transmitted through the PCVI or IS-PCVI as a function of time for expansions 1 (a and b), 2 (c and d), and 3 (e and f).

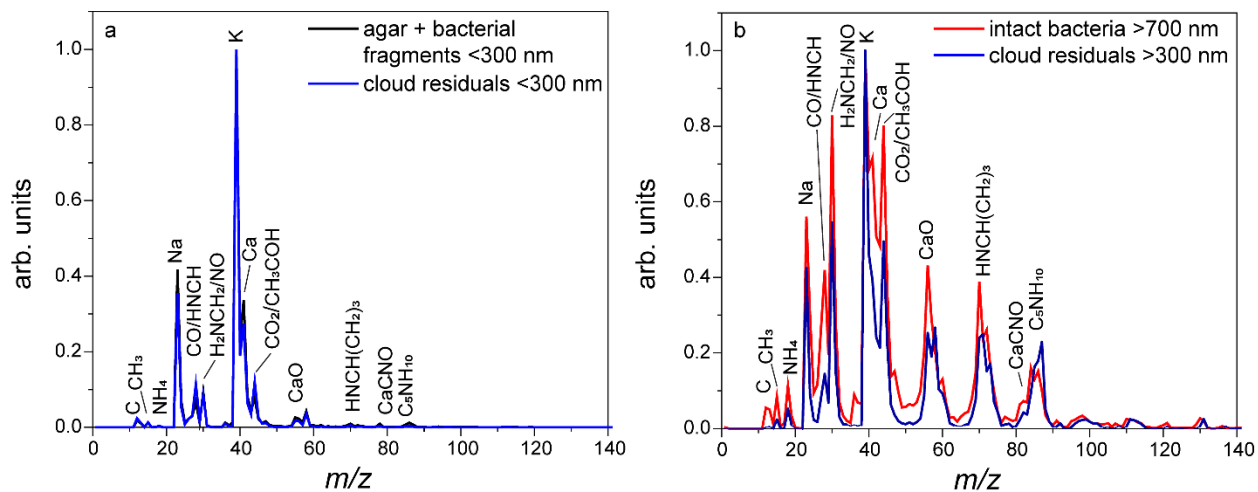

**Figure S2: PF CGina, Expansion 2. (a) Comparison between the MS of cloud residuals smaller than 300 nm and the reference MS of the small particle mode ( $d_{va} < 300$  nm); (b) Comparison between the MS of cloud residuals larger than 300 nm and the MS of intact bacteria ( $d_{va} > 700$  nm).**
